# Supplementary material for: More Harm than Help? Evaluating the Capabilities of Vision-Language Models in Neurological Image Analysis
Source: Research Square preprint supplement (doi:10.21203/rs.3.rs-6183659/v1), 2025-06-16
Supplement: Supplementary file 1 [file bbc7ec043dc5abe082a0fb09.pdf]

| Images                                                                            |                                                                                    | Case presentation and ground truth                                                                                                                    | Gemini 2.0                | GPT-4o1-Preview           | Llama 3.2                 | Qwen 2.5                                                   | Grok                                                   |
|-----------------------------------------------------------------------------------|------------------------------------------------------------------------------------|-------------------------------------------------------------------------------------------------------------------------------------------------------|---------------------------|---------------------------|---------------------------|------------------------------------------------------------|--------------------------------------------------------|
| 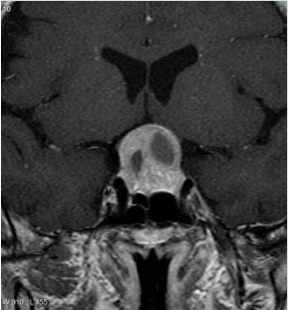  |   | 75 y.o. female with Visual failure. Diagnosis: <b>Pituitary macroadenoma</b>                                                                          | Pituitary Adenoma         | Pituitary Adenoma         | Pituitary Adenoma         | Pituitary Adenoma                                          | Pituitary Adenoma                                      |
|   |   | 47 y.o. female with Sensorineural hearing loss. Diagnosis: <b>Vestibular schwannoma</b>                                                               | Vestibular schwannoma     | Vestibular schwannoma     | Vestibular schwannoma     | Vestibular schwannoma                                      | Vestibular schwannoma                                  |
|  |  | 30 y.o., previously healthy man went into a coma after exposure to a heating gas in a closed environment. Diagnosis: <b>Carbon Monoxide Poisoning</b> | Carbon Monoxide Poisoning | Carbon Monoxide Poisoning | Carbon Monoxide Poisoning | Neurotoxicity-related injury<br>Harm type: Treatment Delay | Acute ischemic stroke.<br>Harm type: Misclassification |

| Images                                                                            |                                                                                    | Case presentation and ground truth                                                                                                                                     | Gemini 2.0                                                                                         | GPT-4o1-Preview                                     | Llama 3.2                                                         | Qwen 2.5                                                           | Grok                                                          |
|-----------------------------------------------------------------------------------|------------------------------------------------------------------------------------|------------------------------------------------------------------------------------------------------------------------------------------------------------------------|----------------------------------------------------------------------------------------------------|-----------------------------------------------------|-------------------------------------------------------------------|--------------------------------------------------------------------|---------------------------------------------------------------|
| 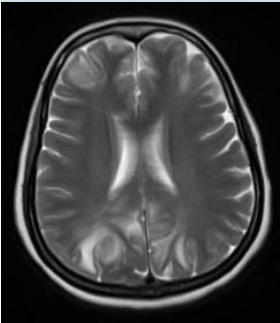  |   | 32 y.o. postpartum hypertensive female, presented with headache and seizures.<br>Diagnosis:<br><b>Posterior reversible encephalopathy syndrome (PRES)</b>              | severe pre-eclampsia/eclampsia with associated posterior reversible encephalopathy syndrome (PRES) | Posterior Reversible Encephalopathy Syndrome (PRES) | Normal pressure hydrocephalus (NPH)<br>Harm type: Treatment Delay | Hypertensive Intracranial Hemorrhage<br>Harm type: Treatment Delay | Multiple Sclerosis (MS)<br>Harm type: Treatment Delay         |
|   |   | 32 y.o. male with seizures (episodes of blackout lasting for 30 minutes associated with headache). 6 attacks over the last 5 months.<br>Diagnosis:<br><b>Cavernoma</b> | high-grade glioma<br>Harm type: Misclassification                                                  | Low-grade glioma<br>Harm type: Misclassification    | Tumor in the left parietal cortex<br>Harm type: No Harm           | Glioblastoma multiforme (GBM)<br>Harm type: Misclassification      | Glioblastoma multiforme (GBM)<br>Harm type: Misclassification |
|  |  | 28 y.o. female, presented with headaches<br>Diagnosis:<br><b>Arachnoid cyst</b>                                                                                        | Meningioma<br>Harm type: Overdiagnosis                                                             | Meningioma<br>Harm type: Overdiagnosis              | Epidermoid cyst<br>Harm type: Misclassification                   | Meningioma<br>Harm type: Overdiagnosis                             | Optic nerve glioma<br>Harm type: Misclassification            |
